# Supplementary material for: Toward quantifying turbulent vertical airflow and sensible heat flux in tall forest canopies using fiber-optic distributed temperature sensing
Source: Copernicus journal article supplement (doi:10.5194/amt-16-809-2023), 2023-02-14
Supplement: Supplementary file 1 [file amt-16-809-2023-supplement.pdf]

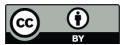

*Supplement of*

## **Toward quantifying turbulent vertical airflow and sensible heat flux in tall forest canopies using fiber-optic distributed temperature sensing**

**Mohammad Abdoli et al.**

*Correspondence to:* Mohammad Abdoli ([mohammad.abdoli@uni-bayreuth.de](mailto:mohammad.abdoli@uni-bayreuth.de))

The copyright of individual parts of the supplement might differ from the article licence.

*Supplement A:*

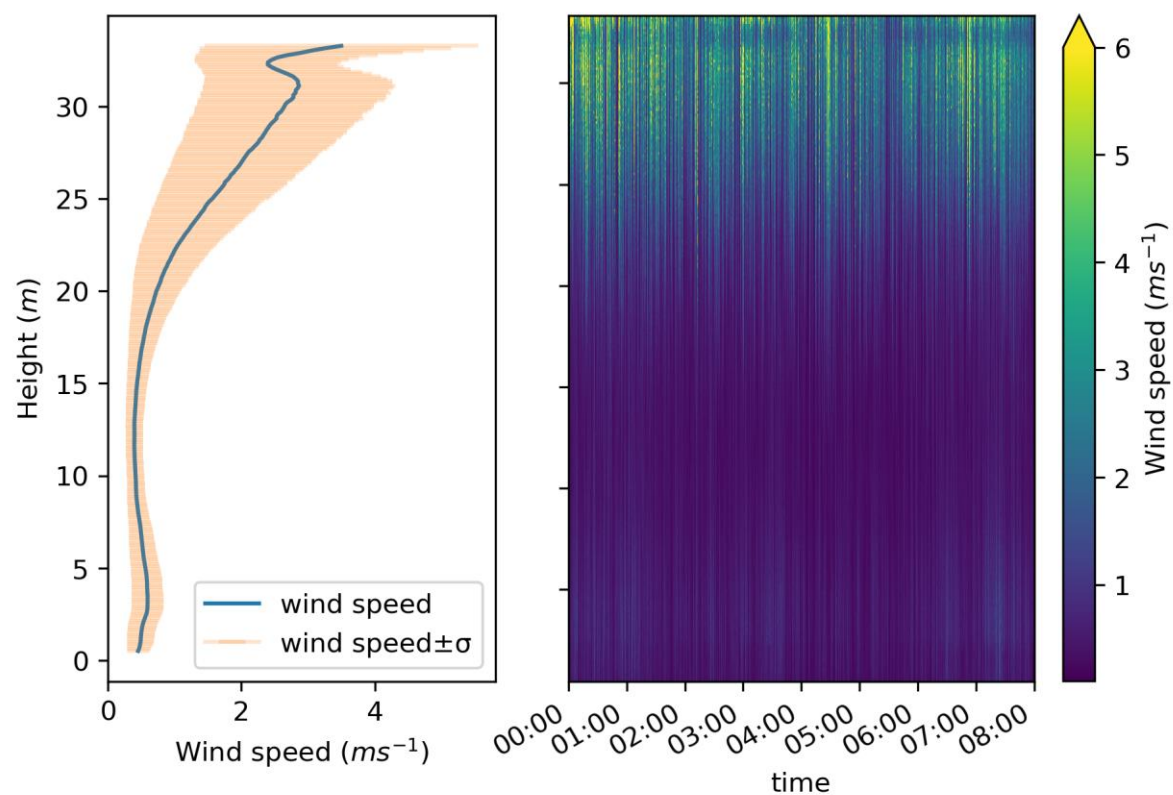

**Fig S1. Left: Horizontal wind speed profile at Waldstein forest canopy at the turbulence tower averaged over 8 hours of distributed wind speed with a time resolution of 6 s and spatial resolution of 0.127 m. The orange error bars show the error bar of averaged wind speed as  $mean \pm \sigma$ . (Right) Distributed horizontal wind speed computed using FODS. Please refer to Sayde et al. (2015) and Lapo et al. (2022) to learn more about the method of computing wind speed using FODS.**
